# Supplementary material
Source: Elsevier journal article supplement (https://www.sciencedirect.com/science/article/pii/S1885585722001554)
Supplement: mmc1 [file S1885585722001554:mmc1.pdf]

## MATERIAL ADICIONAL

### 1. LISTA DE INVESTIGADORES DEL ESTUDIO FRAGIC Y SUS FILIACIONES

César Jiménez-Méndez<sup>a</sup>, Pablo Díez-Villanueva<sup>a</sup>, Beatriz Terres<sup>a</sup>, Álvaro Gamarra<sup>a</sup>, Fernando Alfonso<sup>a</sup>, Clara Bonanad<sup>b</sup>, Mariana Lechuga Ruiz<sup>b</sup>, Carolina Ortiz-Cortés<sup>c</sup>, Paula Gómez<sup>c</sup>, Eduardo Barge-Caballero<sup>d,e</sup>, Josebe Goirigolzarri<sup>f</sup>, María Alejandra Restrepo<sup>f</sup>, Mónica Pérez<sup>f</sup>, Alberto Esteban-Fernández<sup>g</sup>, Angel Pérez-Rivera<sup>h</sup>, Esther Sánchez Corral<sup>h</sup>, Beatriz Fernández-González<sup>h</sup>, Marcos García-Aguado<sup>i</sup>, Teresa Soria<sup>i</sup>, Marta Cobo<sup>i,e</sup>, Amada Recio Platero<sup>j</sup>, Javier López<sup>j,e</sup>, Ancor Sanz-García<sup>k</sup>, Carmen Guerrero<sup>l</sup>, Héctor García Pardo<sup>m</sup>, Carolina Robles<sup>n</sup>, Diego Iglesias<sup>o</sup>, Concepción Cruzado Álvarez<sup>p</sup>, María Robles Mezcuá<sup>p</sup>, Patricia Redondo Gómez<sup>p</sup>, María Dolores Gómez García<sup>p</sup>, José Manuel García Pinilla<sup>p,e</sup>, Luis López Rodríguez<sup>q</sup>, Alberto Pérez<sup>q</sup>, Francesc Formiga<sup>r</sup>, F Javier Martín-Sánchez<sup>s</sup>, María Teresa Vidán<sup>t,u</sup>, Albert Ariza<sup>l</sup> y Manuel Martínez-Sellés<sup>v</sup>

<sup>a</sup>*Servicio de Cardiología, Hospital Universitario de la Princesa, Madrid, España*

<sup>b</sup>*Servicio de Cardiología, Hospital Clínico Universitario de Valencia, Valencia, España*

<sup>c</sup>*Servicio de Cardiología, Hospital Universitario San Pedro de Alcántara, Cáceres, España*

<sup>d</sup>*Servicio de Cardiología, Complejo Hospitalario Universitario de A Coruña, A Coruña, España*

<sup>e</sup>*Centro de Investigación Biomédica en Red de Enfermedades Cardiovasculares (CIBERCV), España*

<sup>f</sup>*Servicio de Cardiología Hospital Clínico Universitario San Carlos, Madrid, España*

<sup>g</sup>*Servicio de Cardiología, Hospital Universitario Severo Ochoa, Leganés, Madrid*

<sup>h</sup>*Servicio de Cardiología, Hospital Universitario de Burgos, Burgos, España*

<sup>i</sup>*Servicio de Cardiología, Hospital Universitario Puerta de Hierro, Majadahonda, Madrid, España*

<sup>j</sup>*Servicio de Cardiología, Hospital Clínico Universitario de Valladolid, España*

<sup>k</sup>*Unidad de Análisis de Datos del Instituto de Investigación Sanitaria del Hospital Universitario de la Princesa, Madrid, España*

<sup>l</sup>*Servicio de Cardiología, Hospital Universitario de Bellvitge, L'Hospitalet de Llobregat, Barcelona, España*

<sup>m</sup>*Servicio de Cardiología, Hospital Universitario Río Hortega, Valladolid, España*

<sup>n</sup>*Servicio de Cardiología, Complejo Hospitalario de Toledo, Toledo, España*

<sup>o</sup>*Servicio de Cardiología, Hospital Universitario Infanta Sofía, San Sebastián de los Reyes, Madrid, España*

<sup>p</sup>*Unidad de Insuficiencia Cardíaca y Cardiopatías Familiares, Hospital Universitario Virgen de la Victoria, IBIMA, Málaga, España*

<sup>q</sup>*Servicio de Cardiología, Hospital de Manacor, Manacor, España*

<sup>r</sup>*Servicio de Medicina Interna, Hospital de Bellvitge, L'Hospitalet de Llobregat, Barcelona, España*

<sup>s</sup>*Servicio de Urgencias, Hospital Clínico Universitario San Carlos, Madrid, España*

<sup>t</sup>*Servicio de Geriátrica, Hospital Universitario Gregorio Marañón, Universidad Complutense de Madrid, Madrid, España*

<sup>u</sup>*Centro de Investigación Biomédica en Red de Fragilidad y Envejecimiento Saludable (CIBERFES), España*

<sup>v</sup>*Servicio de Cardiología, Hospital Universitario Gregorio Marañón, Universidad Europea, Universidad Complutense de Madrid, Madrid, España*

## 2. ESCALAS UTILIZADAS EN LA EVALUACIÓN GERIÁTRICA INTEGRAL

### **Escala FRAIL:**

¿Se siente cansado la mayor parte del tiempo? Respuesta «Sí» (1 punto) / Respuesta «No» (0 puntos)

¿Puede subir un piso de escaleras sin pausas ni ayudas? Respuesta «No» (1 punto) / Respuesta «Sí» (0 puntos)

¿Es capaz de caminar 100 m sin detenerse? Respuesta «No» (1 punto) / Respuesta «Sí» (0 puntos)

¿Tiene más de 5 enfermedades (artritis, diabetes mellitus, infarto, hipertensión arterial, ictus, asma, EPOC, osteoporosis, cáncer colorrectal, cáncer cutáneo, depresión/ansiedad, demencia, úlceras en piernas)? Respuesta «Sí» (1 punto) / Respuesta «No» (0 puntos)

¿Pérdida de peso > 5 kg en el último año? Respuesta «Sí» (1 punto) / Respuesta «No» (0 puntos)

Frágil si  $\geq 3$  puntos

Prefrágil si 1-2 puntos

Robusto si 0 puntos

### **Preguntas autorreferidas según el fenotipo de fragilidad (adaptación de los criterios de Fried)**

Cansancio. ¿Siente frecuentemente que todo lo que hace es un esfuerzo? Respuesta «Sí» (1 punto) / Respuesta «No» (0 puntos)

Fuerza muscular. ¿Presenta dificultad para levantarse de una silla? Respuesta «Sí» (1 punto) / Respuesta «No» (0 puntos)

Lentitud de la marcha. ¿Tiene importante dificultad para caminar fuera de su domicilio? Respuesta «Sí» (1 punto) / Respuesta «No» (0 puntos)

Actividad física. ¿No practica actividad física (pasear) de manera regular (3-4 veces por semana)? Respuesta «Sí» (1 punto) / Respuesta «No» (0 puntos)

Díez-Villanueva P. et al. Fragilidad y pronóstico de pacientes mayores con insuficiencia cardíaca. [*Rev Esp Cardiol.* 2022]

Pérdida de peso. ¿Ha perdido peso de forma no intencionada en el último año? Respuesta «Sí» (1 punto) / Respuesta «No» (0 puntos)

Frágil si  $\geq 3$  puntos

Prefrágil si 1-2 puntos

Robusto si 0 puntos

### Escala visual de movilidad

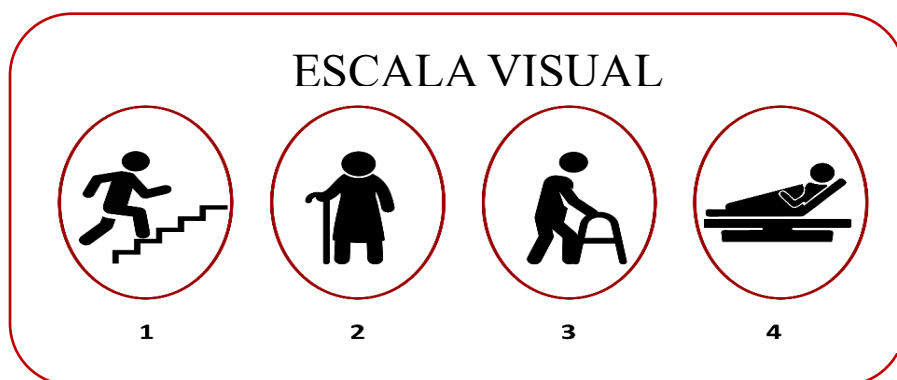

### Short physical performance battery (SPPB)

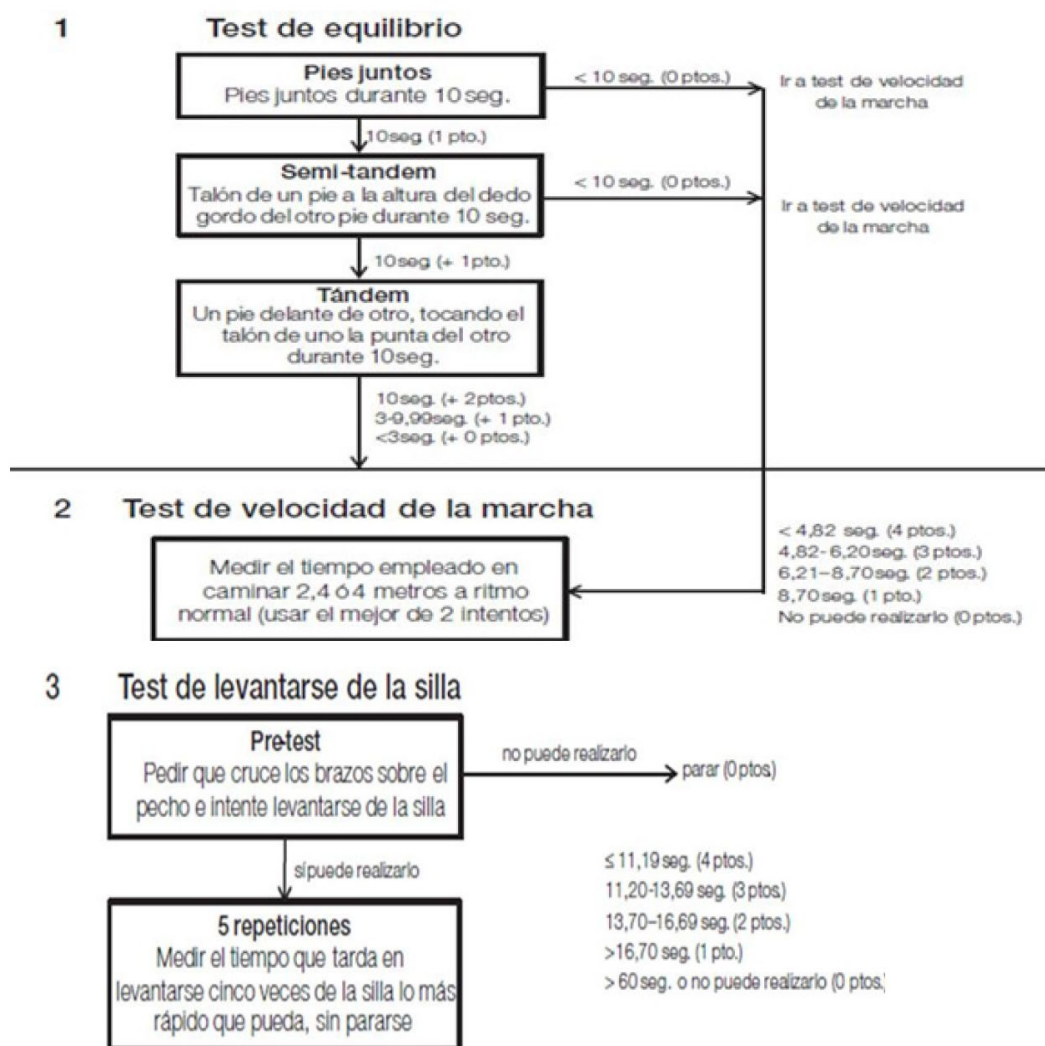

## Escala de fragilidad *Clinical Frailty Scale (CFS)*

### 1. En muy buena forma

Personas que están fuertes, activas, vigorosas y motivadas. Son personas que suelen practicar ejercicio con regularidad. Son de los que están en mejor forma para su edad.

### 2. En forma

Personas sin síntomas de enfermedad activa, pero que están menos en forma que las de la categoría 1. Suele ocurrir que se ejercitan o están muy activas por temporadas, por ejemplo, según la estación.

### 3. En buen estado

Personas que tienen bien controlados sus problemas médicos, pero que no llevan actividad física regular más allá de los paseos habituales.

#### *4. Vulnerables*

Aunque no dependen de otros que les ayuden en la vida diaria, a menudo los síntomas limitan sus actividades. Suelen quejarse de estar «lentos» o cansados durante el día.

#### *5. Levemente frágiles*

Estas personas a menudo tienen un enlentecimiento más evidente y necesitan ayuda para las actividades de la vida diaria importantes (economía, transporte, labores domésticas, medicación). Es típico que la fragilidad leve vaya dificultando que salgan solos de compras o a pasear y hacer la comida o las tareas del hogar.

#### *6. Moderadamente frágiles*

Personas que necesitan ayuda para todas las actividades en el exterior y para realizar las tareas domésticas. En casa, suelen tener problemas con las escaleras y necesitan ayuda con el baño y pueden requerir alguna asistencia para vestirse (guía y acompañamiento).

#### *7. Con fragilidad grave*

Dependen totalmente para el cuidado personal, sea cual fuere la causa (física o cognitiva). Aun así, parecen estables y sin riesgo de muerte (en los siguientes ~6 meses).

#### *8. Con fragilidad muy grave*

Totalmente dependientes, se acercan al final de la vida. Es típico que ni siquiera se recuperen de afecciones menores.

#### *9. Enfermo terminal*

Se aproximan al final de la vida. Esta categoría se aplica a personas con esperanza de vida < 6 meses y sin otros signos de fragilidad.

(Tomada de Díez-Villanueva et al. *Rev Esp Cardiol.* 2019;72:63–71.)

## MATERIAL ADICIONAL. TABLAS

**Tabla 1 del material adicional**

Características basales de los subgrupos de pacientes según la fracción de eyección del ventrículo izquierdo

| Característica                      | FEVI $\leq$ 40%<br>(n = 267) | FEVI 40-49% (n = 78) | FEVI $\geq$ 50%<br>(n = 153) | p       |
|-------------------------------------|------------------------------|----------------------|------------------------------|---------|
| Edad (años)                         | 80,6 $\pm$ 4,13              | 81,8 $\pm$ 4,36      | 82,4 $\pm$ 4,35              | < 0,001 |
| Varones                             | 185 (69,3)                   | 53 (67,9)            | 69 (45,1)                    | < 0,001 |
| IMC                                 | 26,9 $\pm$ 4,54              | 27,9 $\pm$ 4,20      | 28,6 $\pm$ 4,86              | 0,001   |
| Hipertensión                        | 209 (78,6)                   | 57 (73,1)            | 133 (86,9)                   | 0,026   |
| Diabetes                            | 112 (41,9)                   | 30 (39,0)            | 57 (37,3)                    | 0,626   |
| Dislipemia                          | 181 (68,3)                   | 52 (66,7)            | 101 (66,4)                   | 0,914   |
| EPOC                                | 42 (15,7)                    | 9 (11,5)             | 23 (15,0)                    | 0,656   |
| Infarto de miocardio previo         | 111 (41,6)                   | 24 (30,8)            | 22 (14,5)                    | < 0,001 |
| Fibrilación auricular               | 117 (43,8)                   | 45 (57,7)            | 100 (65,4)                   | < 0,001 |
| FEVI (%)                            | 32,0 $\pm$ 6,02              | 44,9 $\pm$ 2,28      | 60,2 $\pm$ 7,07              | < 0,001 |
| Etiología isquémica de la IC        | 132 (50,6)                   | 29 (39,7)            | 0                            | 0,123   |
| Duración de la IC (meses)           | 53,4 $\pm$ 63,0              | 41,1 $\pm$ 38,8      | 37,5 $\pm$ 42,4              | 0,010   |
| Número ingresos IC en el último año | 0,49 $\pm$ 0,94              | 0,45 $\pm$ 0,68      | 0,47 $\pm$ 0,79              | 0,931   |
| NYHA II                             | 228 (85,4)                   | 65 (83,3)            | 128 (83,7)                   | 0,878   |
| Ictus isquémico previo              | 36 (13,6)                    | 10 (12,8)            | 14 (9,15)                    | 0,085   |
| Enfermedad renal crónica            | 117 (43,8)                   | 29 (37,2)            | 63 (41,2)                    | 0,563   |

|                                             |               |               |               |         |
|---------------------------------------------|---------------|---------------|---------------|---------|
| Neoplasia previa                            | 58 (21,7)     | 19 (24,4)     | 25 (16,3)     | 0,275   |
| Fármacos totales                            | 9,52 ± 3,14   | 9,94 ± 3,27   | 9,69 ± 3,39   | 0,598   |
| Presión arterial sistólica (mmHg)           | 120 ± 19,2    | 123 ± 18,6    | 129 ± 17,9    | < 0,001 |
| Edemas                                      | 31 (11,7)     | 11 (14,1)     | 28 (18,3)     | 0,170   |
| Hemoglobina (g/dl)                          | 13,5 ± 1,70   | 13,1 ± 1,93   | 13,1 ± 1,57   | 0,014   |
| Linfocitos ( $\times 10^3/\mu\text{l}$ )    | 2,02 ± 1,06   | 2,07 ± 2,34   | 1,68 ± 0,75   | 0,016   |
| Creatinina (mg/dl)                          | 1,34 ± 0,65   | 1,34 ± 0,73   | 1,20 ± 0,41   | 0,064   |
| Filtrado glomerular (ml/min)                | 51,6 ± 16,6   | 51,6 ± 18,9   | 53,2 ± 18,4   | 0,632   |
| Sodio (mEq/l)                               | 141 ± 3       | 141 ± 3,3     | 141 ± 3,1     | 0,969   |
| Potasio (mEq/l)                             | 4,57 ± 0,5    | 4,52 ± 0,5    | 4,38 ± 0,5    | 0,002   |
| Ferritina (ng/ml)                           | 207 ± 188     | 194 ± 177     | 172 ± 191     | 0,257   |
| NT-proBNP (pg/ml)                           | 3.184 ± 4.499 | 2.391 ± 2.950 | 2.377 ± 2.585 | 0,066   |
| IECA                                        | 55 (20,6)     | 19 (24,4)     | 41 (27,0)     | 0,318   |
| ARA-II                                      | 16 (6,02)     | 16 (20,5)     | 42 (27,6)     | < 0,001 |
| INRA                                        | 170 (63,7)    | 25 (32,1)     | 13 (8,55)     | < 0,001 |
| Bloqueadores beta                           | 237 (88,8)    | 64 (82,1)     | 114 (75,0)    | 0,001   |
| ARM                                         | 154 (57,7)    | 38 (48,7)     | 57 (37,5)     | < 0,001 |
| Diuréticos                                  | 220 (82,4)    | 63 (80,8)     | 137 (90,1)    | 0,067   |
| Índice de comorbilidad (Charlson)           | 3,28 ± 1,96   | 3,12 ± 2,02   | 2,88 ± 1,73   | 0,114   |
| Índice de Barthel (dependiente si < 90)     | 93,4 ± 11,3   | 90,5 ± 13,9   | 91,2 ± 13,7   | 0,096   |
| Escala de Lawton-Brody (dependiente si < 6) | 6,02 ± 1,97   | 5,79 ± 2,28   | 5,97 ± 2,15   | 0,696   |



|                                                           |             |             |             |       |
|-----------------------------------------------------------|-------------|-------------|-------------|-------|
| Estado cognitivo (Pfeiffer) (deterioro si $\leq 4$ )      | 17 (6,37)   | 6 (7,69)    | 9 (5,88)    | 0,867 |
| Riesgo nutricional (MNA-SF) ( $\leq 11$ )                 | 115 (43,1)  | 41 (52,6)   | 79 (51,6)   | 0,149 |
| Frágil (escala FRAIL $\geq 3$ )                           | 47 (17,6)   | 18 (23,1)   | 46 (30,1)   | 0,033 |
| Frágil (CFS)                                              | 30 (11,2)   | 16 (20,5)   | 27 (17,6)   | 0,057 |
| Frágil (Escala visual movilidad $\geq 2$ )                | 139 (52,1)  | 40 (51,3)   | 89 (58,2)   | 0,427 |
| Frágil Escala física (SPPB) (Fragilidad si $< 10$ puntos) | 7,24 (3,24) | 6,96 (3,27) | 6,66 (3,23) | 0,209 |
| Depresión (Yesavage 15 puntos)                            | 64 (24,0)   | 20 (25,6)   | 48 (31,4)   | 0,250 |

ARA-II: antagonistas del receptor de la angiotensina II; ARM: antagonistas del receptor de mineralocorticoides; EPOC: enfermedad pulmonar obstructiva crónica; FEVI: fracción de eyección del ventrículo izquierdo; IC: insuficiencia cardiaca; NYHA: *New York Heart Association*. IECA: inhibidores de la enzima de conversión de la angiotensina; IMC: índice de masa corporal; INRA: inhibidores de la neprilisina y del receptor de la angiotensina. Los valores expresan n (%) o media  $\pm$  desviación estándar.

**Tabla 2 del material adicional**

Variables asociadas con el ingreso a 1 año de seguimiento (análisis univariado)

|                                          | HR   | IC95%     | p       |
|------------------------------------------|------|-----------|---------|
| Crepitantes                              | 3,37 | 2,20-5,18 | < 0,001 |
| Ingurgitación venosa yugular             | 2,62 | 1,49-4,63 | 0,001   |
| Dosis diaria de furosemida (por cada mg) | 1,01 | 1,00-1,01 | 0,001   |
| Enfermedad respiratoria crónica          | 1,77 | 1,26-2,47 | 0,001   |
| Mortalidad en el seguimiento             | 0,98 | 0,97-0,98 | < 0,001 |
| Discapacidad (escala de Barthel)         | 0,98 | 0,97-0,99 | 0,001   |
| Fragilidad (CFS)                         | 2,38 | 1,65-3,42 | < 0,001 |

CFS: *Clinical Frailty Scale*.

Se muestran las variables con  $p \leq 0,001$ .

**Tabla 3 del material adicional**

Predictores independientes de ingreso a 1 año de seguimiento, incluyendo fragilidad según escala FRAIL en el análisis multivariado (incluidas variables de confusión)

|                                            | HR   | IC95%     | p       |
|--------------------------------------------|------|-----------|---------|
| Crepitantes                                | 3,00 | 1,84-4,88 | < 0,001 |
| Ingurgitación venosa yugular               | 1,68 | 0,91-3,10 | 0,09    |
| Dosis diaria de furosemida (por cada mg)   | 1,00 | 1,00-1,01 | < 0,001 |
| Enfermedad respiratoria crónica            | 1,31 | 0,89-1,93 | 0,16    |
| Fragilidad (FRAIL)                         | 0,96 | 0,58-1,61 | 0,90    |
| Mortalidad en el seguimiento               | 1,00 | 0,55-1,82 | 0,98    |
| FEVI                                       | 1,12 | 0,91-1,37 | 0,27    |
| Presión arterial sistólica (por cada mmHg) | 1,00 | 0,99-1,01 | 0,19    |
| Filtrado glomerular (por cada ml/min)      | 1,00 | 0,99-1,01 | 0,91    |
| IECA                                       | 0,74 | 0,45-1,21 | 0,24    |
| ARA-II                                     | 1,04 | 0,62-1,74 | 0,86    |
| Bloqueadores beta                          | 1,02 | 0,64-1,63 | 0,90    |
| ARM                                        | 1,04 | 0,72-1,40 | 0,81    |
| Índice de concordancia C de Harrell = 0,62 |      |           |         |

ARA-II: antagonistas del receptor de la angiotensina II; ARM: antagonistas del receptor de mineralocorticoides; FEVI: fracción de eyección del ventrículo izquierdo; IECA: inhibidores de la enzima de conversión de la angiotensina.

**Tabla 4 del material adicional**

Predictores independientes de ingreso a 1 año de seguimiento incluyendo fragilidad según la escala visual de movilidad en el análisis multivariado (incluidas variables de confusión)

|                                            | HR   | IC95%     | p       |
|--------------------------------------------|------|-----------|---------|
| Crepitantes                                | 3,03 | 1,88-4,91 | < 0,001 |
| Ingurgitación venosa yugular               | 1,69 | 0,92-3,10 | 0,06    |
| Dosis diaria de furosemida (por cada mg)   | 1,00 | 1,00-1,01 | < 0,001 |
| Enfermedad respiratoria crónica            | 1,31 | 0,89-1,93 | 0,16    |
| Fragilidad (escala visual de movilidad)    | 0,92 | 0,63-1,34 | 0,68    |
| Mortalidad en el seguimiento               | 1,00 | 0,55-1,81 | 0,98    |
| FEVI                                       | 1,11 | 0,90-1,37 | 0,29    |
| Presión arterial sistólica (por cada mmHg) | 1,00 | 0,99-1,01 | 0,18    |
| Filtrado glomerular (por cada ml/min)      | 1,00 | 0,98-1,01 | 0,94    |
| IECA                                       | 0,75 | 0,46-1,22 | 0,25    |
| ARA-II                                     | 1,05 | 0,63-1,75 | 0,84    |
| Bloqueadores beta                          | 1,02 | 0,64-1,63 | 0,90    |
| ARM                                        | 1,05 | 0,73-1,50 | 0,78    |
| Índice de concordancia C de Harrell = 0,62 |      |           |         |

ARA-II: antagonistas del receptor de la angiotensina II; ARM: antagonistas del receptor de mineralocorticoides; FEVI: fracción de eyección del ventrículo izquierdo; IECA: inhibidores de la enzima de conversión de la angiotensina.

**Tabla 5 del material adicional**

Predictores independientes de ingreso a 1 año de seguimiento incluyendo fragilidad según la escala CFS en el análisis multivariado (incluidas variables de confusión)

|                                            | HR   | IC 95%    | p       |
|--------------------------------------------|------|-----------|---------|
| Crepitantes                                | 2,70 | 1,66-4,40 | < 0,001 |
| Ingurgitación venosa yugular               | 1,73 | 0,94-3,18 | 0,07    |
| Dosis diaria de furosemida (por cada mg)   | 1,00 | 1,00-1,01 | 0,03    |
| Enfermedad respiratoria crónica            | 1,24 | 0,84-1,84 | 0,27    |
| Fragilidad (CFS)                           | 1,60 | 1,02-2,51 | 0,03    |
| Mortalidad en el seguimiento               | 0,99 | 0,55-1,79 | 0,99    |
| FEVI                                       | 1,12 | 0,91-1,37 | 0,27    |
| Presión arterial sistólica (por cada mmHg) | 1,00 | 0,99-1,01 | 0,19    |
| Filtrado glomerular (por cada ml/min)      | 0,99 | 0,99-1,01 | 0,97    |
| IECA                                       | 0,72 | 0,44-1,18 | 0,19    |
| ARA-II                                     | 1,07 | 0,64-1,79 | 0,76    |
| Bloqueadores beta                          | 1,05 | 0,66-1,69 | 0,80    |
| ARM                                        | 1,06 | 0,74-1,51 | 0,73    |
| Índice de concordancia C de Harrell = 0,62 |      |           |         |

ARA-II: antagonistas del receptor de la angiotensina II; ARM: antagonistas del receptor de mineralocorticoides; CFS: *Clinical Frailty Scale*; FEVI: fracción de eyección del ventrículo izquierdo; IECA: inhibidores de la enzima de conversión de la angiotensina.

**Tabla 6 del material adicional**

Comparación de las características basales y mortalidad a 1 año de los principales trabajos que evalúan la fragilidad en insuficiencia cardiaca

|                                   | FRAGIC                   | Rodríguez-Pascual et al., 2017 <sup>27</sup> | Vidan et al., 2016 <sup>28</sup>         | Chivite et al., 2017 <sup>26</sup> |
|-----------------------------------|--------------------------|----------------------------------------------|------------------------------------------|------------------------------------|
| Tamaño muestra                    | 499 pacientes            | 497 pacientes                                | 450 pacientes                            | 2.195 pacientes                    |
| Inclusión y seguimiento           | Cardiología              | Geriatría                                    | Geriatría, Medicina Interna, Cardiología | Medicina interna                   |
| Tipo de estudio                   | Multicéntrico            | Multicéntrico                                | Unicéntrico                              | Multicéntrico                      |
| Ámbito                            | Ambulatorio              | 30 días después de una hospitalización       | Hospitalización                          | Hospitalización                    |
| Media de edad (años)*             | 81,4 ± 4,3               | 85,2 ± 7,3                                   | 80 ± 6                                   | 83 (79-86)                         |
| Mujeres                           | 38,3%                    | 61%                                          | 49,5%                                    | 57%                                |
| Índice de Charlson (comorbilidad) | 3,1 ± 1,9                | 3,2 ± 1,8                                    | 3,5                                      | 3 (1-4)                            |
| Etiología isquémica de la IC      | 48,2%                    | 23,5%                                        | 39,65%                                   | 27%                                |
| Fragilidad (%) y escala utilizada | FRAIL 22,2%<br>EVM 53,9% | Fried 57,5%                                  | Fried 76%                                | No valorada                        |

|                   |       |     |       |     |
|-------------------|-------|-----|-------|-----|
| Mortalidad al año | 11,6% | 20% | 20,6% | 26% |
|-------------------|-------|-----|-------|-----|

EVM: escala visual de movilidad; IC: insuficiencia cardiaca.

\*Se expresan los datos según aparecen recogidos en los trabajos originales, ya sea como media  $\pm$  desviación estándar o mediana [intervalo intercuartílico].

**Tabla 7 del material adicional**

Asociación entre los componentes de la escala FRAIL y la mortalidad a 1 año

|                                                                                                                                                                                                                                   | <i>Hazard ratio</i> | IC95%     | p     |
|-----------------------------------------------------------------------------------------------------------------------------------------------------------------------------------------------------------------------------------|---------------------|-----------|-------|
| ¿Se siente cansado la mayor parte del tiempo? Respuesta «Sí»                                                                                                                                                                      | 2,20                | 1,31-3,72 | 0,003 |
| ¿Puede subir un piso de escaleras sin pausas ni ayudas? Respuesta «No»                                                                                                                                                            | 1,55                | 0,92-2,61 | 0,100 |
| ¿Es capaz de caminar 100 m sin detenerse? Respuesta «No»                                                                                                                                                                          | 1,96                | 1,16-3,30 | 0,012 |
| ¿Tiene más de 5 enfermedades (artritis, diabetes mellitus, infarto, hipertensión arterial, ictus, asma, EPOC, osteoporosis, cáncer colorrectal, cáncer cutáneo, depresión/ansiedad, demencia, úlceras en piernas)? Respuesta «Sí» | 1,03                | 0,50-2,09 | 0,945 |
| ¿Pérdida de peso > 5 kg en el último año? Respuesta «Sí»                                                                                                                                                                          | 1,55                | 0,82-2,93 | 0,176 |



**Tabla 8 del material adicional**

Predictores independientes de mortalidad a 1 año incluyendo la escala FRAIL ajustada por variables de confusión

|                                            | HR   | IC 95%    | p      |
|--------------------------------------------|------|-----------|--------|
| Hemoglobina (por cada g/dl)                | 0,74 | 0,61-0,89 | < 0,01 |
| Linfocitos (por $\mu$ l)                   | 0,70 | 0,49-1,01 | 0,06   |
| Urea (por cada mg/dl)                      | 1,00 | 0,99-1,01 | 0,41   |
| NT-proBNP > 1.000 pg/ml                    | 2,33 | 0,93-5,78 | 0,06   |
| Fragilidad (escala FRAIL)                  | 2,18 | 0,88-5,36 | 0,08   |
| FEVI                                       | 1,20 | 0,85-1,69 | 0,28   |
| Presión arterial sistólica (por cada mmHg) | 0,99 | 0,97-1,00 | 0,30   |
| Filtrado glomerular (por cada ml/min)      | 0,99 | 0,97-1,01 | 0,77   |
| IECA                                       | 1,41 | 0,76-2,64 | 0,27   |
| ARA-II                                     | 0,52 | 0,17-1,57 | 0,25   |
| Bloqueadores beta                          | 0,85 | 0,38-1,8  | 0,68   |
| ARM                                        | 1,47 | 0,82-2,63 | 0,18   |
| Diuréticos                                 | 1,59 | 0,47-5,42 | 0,45   |
| Índice de concordancia C de Harrell = 0,75 |      |           |        |

ARA-II: antagonistas del receptor de la angiotensina II; ARM: antagonistas del receptor de mineralocorticoides; FEVI: fracción de eyección del ventrículo izquierdo; IECA: inhibidores de la enzima de conversión de la angiotensina.

**Tabla 9 del material adicional**

Predictores independientes de mortalidad a 1 año incluyendo fragilidad según la escala CFS ajustada por las variables de confusión

|                                              | HR   | IC95%     | p      |
|----------------------------------------------|------|-----------|--------|
| Hemoglobina (por cada g/dl)                  | 0,73 | 0,61-0,89 | < 0,01 |
| Linfocitos (por $\mu$ l)                     | 0,72 | 0,51-1,03 | 0,07   |
| Urea (por cada mg/dl)                        | 1,01 | 0,99-1,01 | 0,54   |
| NT-proBNP > 1.000 pg/ml                      | 2,35 | 0,94-5,86 | 0,06   |
| Fragilidad (CFS)                             | 1,25 | 0,63-2,46 | 0,51   |
| FEVI                                         | 1,29 | 0,91-1,82 | 0,14   |
| Presión arterial sistólica (por cada mmHg)   | 0,99 | 0,97-1,00 | 0,26   |
| Filtrado glomerular (por cada ml/min)        | 0,99 | 0,97-1,01 | 0,83   |
| IECA                                         | 1,42 | 0,76-2,67 | 0,26   |
| ARA-II                                       | 0,52 | 0,17-1,59 | 0,25   |
| Bloqueadores beta                            | 0,88 | 0,40-1,97 | 0,77   |
| ARM                                          | 1,44 | 0,82-2,55 | 0,21   |
| Diuréticos                                   | 1,54 | 0,45-5,21 | 0,48   |
| Índice de comorbilidad (Charlson)            | 1,11 | 0,96-1,29 | 0,12   |
| Índice de concordancia C de Harrell = 0,7478 |      |           |        |

ARA-II: antagonistas del receptor de la angiotensina II; ARM: antagonistas del receptor de mineralocorticoides; CFS: *Clinical Frailty Scale*; FEVI: fracción de eyección del ventrículo izquierdo; IECA: inhibidores de la enzima de conversión de la angiotensina.

**Tabla 10 del material adicional**

Predictores independientes de mortalidad a 1 año incluyendo fragilidad según la escala SPPB ajustada por las variables de confusión

|                                            | HR   | IC95%     | p      |
|--------------------------------------------|------|-----------|--------|
| Hemoglobina (por cada g/dl)                | 0,73 | 0,61-0,87 | < 0,01 |
| Linfocitos (por $\mu$ l)                   | 0,73 | 0,51-1,04 | 0,08   |
| Urea (por cada mg/dl)                      | 1,00 | 0,99-1,01 | 0,66   |
| NT-proBNP > 1.000 pg/ml                    | 2,36 | 0,95-5,87 | 0,06   |
| Fragilidad (SPPB)                          | 1,25 | 0,56-2,76 | 0,57   |
| FEVI                                       | 1,29 | 0,92-1,82 | 0,13   |
| Presión arterial sistólica (por cada mmHg) | 0,99 | 0,97-1,00 | 0,28   |
| Filtrado glomerular (por cada ml/min)      | 0,99 | 0,97-1,01 | 0,75   |
| IECA                                       | 1,41 | 0,75-2,64 | 0,27   |
| ARA-II                                     | 0,51 | 0,17-1,55 | 0,24   |
| Bloqueadores beta                          | 0,84 | 0,38-1,84 | 0,67   |
| ARM                                        | 1,42 | 0,80-2,53 | 0,22   |
| Diuréticos                                 | 1,53 | 0,45-5,20 | 0,49   |
| Índice de comorbilidad (Charlson)          | 1,12 | 0,97-1,29 | 0,11   |
| Índice de concordancia C de Harrell = 0,74 |      |           |        |

ARA-II: antagonistas del receptor de la angiotensina II; ARM: antagonistas del receptor de mineralocorticoides; FEVI: fracción de eyección del ventrículo izquierdo; IECA: inhibidores de la enzima de conversión de la angiotensina; SPPB: *Short Physical performance battery*.
